# Supplementary material for: Adverse Events as Potential Predictive Factors of Activity in Patients with Advanced HCC Treated with Atezolizumab Plus Bevacizumab
Source: PubMed Central journal article supplement — Target Oncol. 2024 Apr 30;19(4):645–59. doi: 10.1007/s11523-024-01061-0 (PMC11230956; doi:10.1007/s11523-024-01061-0), 2024-04-30
Supplement: 11523_2024_1061_MOESM1_ESM.pdf [file 11523_2024_1061_MOESM1_ESM.pdf]

## **Adverse events as potential predictive factors of activity in patients with advanced HCC treated with atezolizumab plus bevacizumab**

Mara Persano<sup>1\*</sup>, Margherita Rimini<sup>2\*</sup>, Toshifumi Tada<sup>3</sup>, Goki Suda<sup>4</sup>, Shigeo Shimose<sup>5</sup>, Masatoshi Kudo<sup>6</sup>, Federico Rossari<sup>2,7</sup>, Changhoon Yoo<sup>8</sup>, Jaekyung Cheon<sup>9</sup>, Fabian Finkelmeier<sup>10</sup>, Ho Yeong Lim<sup>11</sup>, José Presa<sup>12</sup>, Gianluca Masi<sup>13,14</sup>, Francesca Bergamo<sup>15</sup>, Elisabeth Amadeo<sup>2</sup>, Francesco Vitiello<sup>2</sup>, Takashi Kumada<sup>16</sup>, Naoya Sakamoto<sup>4</sup>, Hideki Iwamoto<sup>5</sup>, Tomoko Aoki<sup>6</sup>, Hong Jae Chon<sup>9</sup>, Vera Himmelsbach<sup>10</sup>, Massimo Alberto Iavarone<sup>17</sup>, Giuseppe Cabibbo<sup>18</sup>, Margarida Montes<sup>12</sup>, Francesco Giuseppe Foschi<sup>19</sup>, Caterina Vivaldi<sup>13,14</sup>, Caterina Soldà<sup>15</sup>, Takuya Sho<sup>4</sup>, Takashi Niizeki<sup>5</sup>, Naoshi Nishida<sup>6</sup>, Christoph Steup<sup>10</sup>, Mariangela Bruccoleri<sup>17</sup>, Masashi Hirooka<sup>20</sup>, Kazuya Kariyama<sup>21</sup>, Joji Tani<sup>22</sup>, Masanori Atsukawa<sup>23</sup>, Koichi Takaguchi<sup>24</sup>, Ei Itobayashi<sup>25</sup>, Shinya Fukunishi<sup>26</sup>, Kunihiko Tsuji<sup>27</sup>, Toru Ishikawa<sup>28</sup>, Kazuto Tajiri<sup>29</sup>, Hironori Ochi<sup>30</sup>, Satoshi Yasuda<sup>31</sup>, Hidenori Toyoda<sup>31</sup>, Chikara Ogawa<sup>32</sup>, Takashi Nishimura<sup>33</sup>, Takeshi Hatanaka<sup>34</sup>, Satoru Kakizaki<sup>35</sup>, Noritomo Shimada<sup>36</sup>, Kazuhito Kawata<sup>37</sup>, Atsushi Hiraoka<sup>38</sup>, Fujimasa Tada<sup>38</sup>, Hideko Ohama<sup>38</sup>, Kazuhiro Nouse<sup>21</sup>, Asahiro Morishita<sup>22</sup>, Akemi Tsutsui<sup>24</sup>, Takuya Nagano<sup>24</sup>, Norio Itokawa<sup>23</sup>, Tomomi Okubo<sup>23</sup>, Michitaka Imai<sup>28</sup>, Hisashi Kosaka<sup>39</sup>, Atsushi Naganuma<sup>40</sup>, Yohei Koizumi<sup>20</sup>, Shinichiro Nakamura<sup>3</sup>, Masaki Kaibori<sup>39</sup>, Hiroko Iijima<sup>33</sup>, Yoichi Hiasa<sup>20</sup>, Silvia Foti<sup>2</sup>, Silvia Camera<sup>2</sup>, Fabio Piscaglia<sup>41</sup>, Mario Scartozzi<sup>1</sup>, Stefano Cascinu<sup>2</sup>, Andrea Casadei-Gardini<sup>2</sup>

\*Co-first authors

**Corresponding author:** Mara Persano; Email [marapersano@alice.it](mailto:marapersano@alice.it)

1. Medical Oncology, University and University Hospital of Cagliari, Cagliari, Italy
2. Department of Oncology, Vita-Salute San Raffaele University, IRCCS San Raffaele Scientific Institute Hospital, Milan, Italy
3. Department of Internal Medicine, Japanese Red Cross Himeji Hospital, Himeji, Japan.
4. Department of Gastroenterology and Hepatology, Graduate School of Medicine, Hokkaido University; North 15, West 7, Kita-ku, Sapporo, Hokkaido 060-8638, Japan.
5. Division of Gastroenterology, Department of Medicine, Kurume University School of Medicine, Kurume, Fukuoka 830-0011, Japan.
6. Department of Gastroenterology and Hepatology, Kindai University Faculty of Medicine, Osaka, Japan.
7. San Raffaele Telethon Institute for Gene Therapy (SR-Tiget), IRCCS San Raffaele Scientific Institute Hospital, Milan, Italy
8. Department of Oncology, ASAN Medical Center, University of Ulsan College of Medicine, 88, Olympic-ro 43-gil, Songpa-gu, Seoul 05505, Korea
9. Department of Medical Oncology, CHA Bundang Medical Center, CHA University School of Medicine, Seongnam, Republic of Korea.
10. Department of Internal Medicine 1, University Hospital Frankfurt, Goethe University, Frankfurt am Main, Germany.
11. Department of Medicine, Samsung Medical Center, School of Medicine, Sungkyunkwan University, Seoul, South Korea.
12. Liver Unit-CHTMAD, Vila Real, Portugal

13. Unit of Medical Oncology 2, University Hospital of Pisa, Pisa, Italy
14. Department of Translational Research and New Technologies in Medicine and Surgery, University of Pisa, Pisa, Italy
15. Oncology Unit 1, Veneto Institute of Oncology IOV-IRCCS, Padua, Italy
16. Department of Nursing, Gifu Kyoritsu University, Ogaki, Japan
17. Division of Gastroenterology and Hepatology, Foundation IRCCS Ca' Granda Ospedale Maggiore Policlinico, Milan, Italy
18. Section of Gastroenterology and Hepatology, Department of Health Promotion, Mother and Child Care, Internal Medicine and Medical Specialties PROMISE, University of Palermo, Palermo, Italy
19. Department of Internal Medicine, Ospedale di Faenza, Faenza, Italy
20. Department of Gastroenterology and Metabology, Ehime University Graduate School of Medicine, Ehime, Japan
21. Department of Gastroenterology, Okayama City Hospital, Okayama, Japan
22. Department of Gastroenterology and Hepatology, Kagawa University, Kagawa, Japan
23. Division of Gastroenterology and Hepatology, Department of Internal Medicine, Nippon Medical School, Tokyo, Japan
24. Department of Hepatology, Kagawa Prefectural Central Hospital, Takamatsu, Japan
25. Department of Gastroenterology, Asahi General Hospital, Asahi, Japan
26. Department of Gastroenterology, Osaka Medical and Pharmaceutical University, Osaka, Japan
27. Center of Gastroenterology, Teine Keijinkai Hospital, Sapporo, Japan
28. Department of Gastroenterology, Saiseikai Niigata Hospital, Niigata, Japan
29. Department of Gastroenterology, Toyama University Hospital, Toyama, Japan
30. Hepato-biliary Center, Japanese Red Cross Matsuyama Hospital, Matsuyama, Japan
31. Department of Gastroenterology and Hepatology, Ogaki Municipal Hospital, Ogaki, Japan
32. Department of Gastroenterology, Japanese Red Cross Takamatsu Hospital, Takamatsu, Japan
33. Department of Internal medicine, Division of Gastroenterology and Hepatology, Hyogo Medical University, Nishinomiya, Japan
34. Department of Gastroenterology, Gunma Saiseikai Maebashi Hospital, Maebashi, Japan
35. Department of Clinical Research, National Hospital Organization Takasaki General Medical Center, Takasaki, Japan
36. Division of Gastroenterology and Hepatology, Otakanomori Hospital, Kashiwa, Japan
37. Department of Hepatology, Hamamatsu University School of Medicine, Hamamatsu, Japan
38. Gastroenterology Center, Ehime Prefectural Central Hospital, Matsuyama, Japan
39. Department of Surgery, Kansai Medical University, Osaka, Japan
40. Department of Gastroenterology, National Hospital Organization Takasaki General Medical Center, Takasaki, Japan

41. Division of Internal Medicine, Hepatobiliary and Immunoallergic diseases, IRCCS Azienda Ospedaliero-Universitaria di Bologna, Bologna, Italy

**RUNNING HEADER: adverse events in HCC patients treated with atezolizumab plus  
bevacizumab**

|                            |             |
|----------------------------|-------------|
| MALE                       | 657 (79.8%) |
| FEMALE                     | 166 (20.2%) |
| ≤ 70                       | 339 (41.2%) |
| > 70                       | 484 (58.8%) |
| VIRAL                      | 442 (53.7%) |
| NO VIRAL                   | 381 (46.3%) |
| AT LEAST ONE LOCAL THERAPY | 569 (69.1%) |
| NO LOCAL THERAPY           | 205 (24.9%) |
| CP A                       | 769 (93.4%) |
| CP B                       | 54 (6.6%)   |
| BCLC B                     | 335 (40.7%) |
| BCLC C                     | 488 (59.3%) |
| PS 0                       | 615 (74.7%) |
| PS ≥ 1                     | 208 (25.3%) |
| PVT                        | 175 (21.3%) |
| NO PVT                     | 648 (78.7%) |
| AFP < 400 ng/mL            | 578 (70.2%) |
| AFP ≥ 400 ng/mL            | 240 (29.2%) |
| EHD                        | 305 (37.1%) |
| NO EHD                     | 517 (62.8%) |
| ALBI 1                     | 752 (91.4%) |
| ALBI 2                     | 66 (8.0%)   |
| NLR ≤ 3                    | 435 (52.8%) |
| NLR > 3                    | 304 (36.9%) |

**Supplementary Table 1.** Baseline characteristics of study population. AFP: alpha-feto-protein; ALBI: Albumin-Bilirubin; BCLC: Barcelona Clinic Liver Cancer; CP: Child-Pugh; EHD: extrahepatic disease; NLR: neutrophil-lymphocyte ratio; PS: performance status; PVT: portal vein thrombosis.

|                               | IMMUNOTOXICITY<br>111 (13.5%) | NO<br>IMMUNOTOXICITY<br>712 (86.5%) | P    | HYPOTHYROIDISM<br>44 (5.3%) | NO<br>HYPOTHYROIDISM<br>779 (94.6%) | P    |
|-------------------------------|-------------------------------|-------------------------------------|------|-----------------------------|-------------------------------------|------|
| MALE                          | 83 (74.8%)                    | 574 (80.6%)                         | 0.16 | 36 (81.8%)                  | 621 (79.7%)                         | 0.85 |
| FEMALE                        | 28 (25.2%)                    | 138 (19.4%)                         |      | 8 (18.2%)                   | 158 (20.3%)                         |      |
| ≤ 70                          | 46 (41.4%)                    | 293 (41.1%)                         | 1.00 | 15 (34.1%)                  | 324 (41.6%)                         | 0.35 |
| > 70                          | 65 (58.5%)                    | 419 (58.8%)                         |      | 29 (65.9%)                  | 455 (58.4%)                         |      |
| VIRAL                         | 60 (54.0%)                    | 382 (53.6%)                         | 1.00 | 25 (56.8%)                  | 417 (53.5%)                         | 0.76 |
| NO VIRAL                      | 51 (45.9%)                    | 330 (46.3%)                         |      | 19 (43.2%)                  | 362 (46.5%)                         |      |
| AT LEAST ONE LOCAL<br>THERAPY | 73 (65.8%)                    | 496 (69.7%)                         | 0.24 | 35 (79.5%)                  | 534 (68.5%)                         | 0.48 |
| NO LOCAL THERAPY              | 33 (29.7%)                    | 172 (24.1%)                         |      | 9 (20.4%)                   | 196 (25.2%)                         |      |
| CP A                          | 103 (92.8%)                   | 666 (93.5%)                         | 0.68 | 44 (100.0%)                 | 725 (93.1%)                         | 0.11 |
| CP B                          | 8 (7.2%)                      | 46 (6.5%)                           |      | 0 (0.0%)                    | 54 (6.9%)                           |      |
| BCLC B                        | 38 (34.2%)                    | 297 (41.7%)                         | 0.15 | 22 (50.0%)                  | 313 (40.2%)                         | 0.21 |
| BCLC C                        | 73 (65.8%)                    | 415 (58.3%)                         |      | 22 (50.0%)                  | 466 (59.8%)                         |      |
| PS 0                          | 107 (96.4%)                   | 698 (98.0%)                         | 0.29 | 31 (70.4%)                  | 584 (75.0%)                         | 0.48 |
| PS ≥ 1                        | 4 (3.6%)                      | 14 (2.0%)                           |      | 13 (29.5%)                  | 195 (25.0%)                         |      |
| PVT                           | 29 (26.1%)                    | 146 (20.5%)                         | 0.21 | 6 (13.6%)                   | 169 (21.7%)                         | 0.26 |
| NO PVT                        | 82 (73.9%)                    | 566 (79.5%)                         |      | 38 (86.4%)                  | 610 (78.3%)                         |      |
| AFP < 400 ng/mL               | 83 (74.8%)                    | 495 (69.5%)                         | 0.26 | 37 (84.1%)                  | 541 (69.4%)                         | 0.06 |
| AFP ≥ 400 ng/mL               | 27 (24.3%)                    | 213 (29.9%)                         |      | 7 (15.9%)                   | 233 (29.9%)                         |      |
| EHD                           | 43 (38.7%)                    | 262 (36.8%)                         | 0.75 | 12 (27.3%)                  | 293 (37.6%)                         | 0.20 |
| NO EHD                        | 68 (61.3%)                    | 449 (63.1%)                         |      | 32 (72.7%)                  | 485 (62.2%)                         |      |
| ALBI 1                        | 100 (90.1%)                   | 652 (91.6%)                         | 0.45 | 42 (95.4%)                  | 710 (91.1%)                         | 0.57 |
| ALBI 2                        | 11 (9.9%)                     | 55 (7.7%)                           |      | 2 (4.5%)                    | 64 (8.2%)                           |      |
| NLR ≤ 3                       | 33 (29.7%)                    | 402 (56.5%)                         | 0.12 | 21 (47.7%)                  | 414 (53.1%)                         | 1.00 |
| NLR > 3                       | 34 (30.6%)                    | 270 (37.9%)                         |      | 14 (31.8%)                  | 290 (3.7%)                          |      |

**Supplementary Table 2.** Baseline characteristics of patients presenting and not presenting immunotoxicity and of patients presenting and not presenting hypothyroidism. AFP: alpha-feto-protein; ALBI: Albumin-Bilirubin; BCLC: Barcelona Clinic Liver Cancer; CP: Child-Pugh; EHD: extrahepatic disease; NLR: neutrophil-lymphocyte ratio; PS: performance status; PVT: portal vein thrombosis.

|                            | DECREASED APPETITE<br>176 (13.5%) | NO DECREASED APPETITE<br>647 (86.5%) | P               | FATIGUE<br>214 (26.0%) | NO FATIGUE<br>609 (74.0%) | P           |
|----------------------------|-----------------------------------|--------------------------------------|-----------------|------------------------|---------------------------|-------------|
| MALE                       | 141 (80.1%)                       | 516 (79.7%)                          | 1.00            | 169 (79.0%)            | 488 (80.1%)               | 0.77        |
| FEMALE                     | 35 (19.9%)                        | 131 (20.2%)                          |                 | 45 (21.0%)             | 121 (19.9%)               |             |
| ≤ 70                       | 65 (36.9%)                        | 274 (42.3%)                          | 0.23            | 89 (41.6%)             | 250 (41.0%)               | 0.93        |
| > 70                       | 111 (63.1%)                       | 373 (57.6%)                          |                 | 125 (58.4%)            | 359 (58.9%)               |             |
| VIRAL                      | 77 (43.7%)                        | 365 (56.4%)                          | <b>&lt;0.01</b> | 111 (51.9%)            | 331 (54.3%)               | 0.58        |
| NO VIRAL                   | 99 (56.2%)                        | 282 (43.6%)                          |                 | 103 (48.1%)            | 278 (45.6%)               |             |
| AT LEAST ONE LOCAL THERAPY | 113 (64.2%)                       | 456 (70.5%)                          | 0.76            | 144 (67.3%)            | 425 (69.8%)               | 0.57        |
| NO LOCAL THERAPY           | 43 (24.4%)                        | 162 (25.0%)                          |                 | 47 (22.0%)             | 158 (25.9%)               |             |
| CP A                       | 162 (92.0%)                       | 607 (93.8%)                          | 0.39            | 199 (93.0%)            | 570 (93.6%)               | 0.75        |
| CP B                       | 14 (7.9%)                         | 40 (6.2%)                            |                 | 15 (7.0%)              | 39 (6.4%)                 |             |
| BCLC B                     | 59 (33.5%)                        | 276 (42.6%)                          | <b>0.03</b>     | 76 (35.5%)             | 259 (42.5%)               | 0.07        |
| BCLC C                     | 117 (66.5%)                       | 371 (57.3%)                          |                 | 138 (64.5%)            | 350 (57.5%)               |             |
| PS 0                       | 116 (65.9%)                       | 499 (77.1%)                          | <b>&lt;0.01</b> | 150 (70.1%)            | 465 (76.3%)               | 0.08        |
| PS ≥ 1                     | 60 (34.1%)                        | 148 (22.9%)                          |                 | 64 (29.9%)             | 144 (23.6%)               |             |
| PVT                        | 42 (23.8%)                        | 133 (20.5%)                          | 0.35            | 57 (26.6%)             | 118 (19.4%)               | <b>0.03</b> |
| NO PVT                     | 134 (76.1%)                       | 514 (79.4%)                          |                 | 157 (73.4%)            | 491 (80.6%)               |             |
| AFP < 400 ng/mL            | 116 (65.9%)                       | 462 (71.4%)                          | 0.13            | 150 (70.1%)            | 428 (70.3%)               | 0.86        |
| AFP ≥ 400 ng/mL            | 60 (34.1%)                        | 180 (27.8%)                          |                 | 64 (29.9%)             | 176 (28.9%)               |             |
| EHD                        | 69 (39.2%)                        | 236 (36.5%)                          | 0.54            | 80 (37.4%)             | 225 (36.9%)               | 0.93        |
| NO EHD                     | 107 (60.8%)                       | 410 (63.4%)                          |                 | 134 (62.6%)            | 383 (62.9%)               |             |
| ALBI 1                     | 160 (90.9%)                       | 592 (91.5%)                          | 1.00            | 198 (92.5%)            | 554 (91.0%)               | 0.46        |
| ALBI 2                     | 14 (7.9%)                         | 52 (8.0%)                            |                 | 14 (6.5%)              | 52 (8.5%)                 |             |
| NLR ≤ 3                    | 89 (50.6%)                        | 346 (53.5%)                          | 0.07            | 105 (49.1%)            | 330 (54.2%)               | 0.05        |
| NLR > 3                    | 80 (45.4%)                        | 224 (34.6%)                          |                 | 93 (43.4%)             | 211 (34.6%)               |             |

**Supplementary Table 3.** Baseline characteristics of patients presenting and not presenting decreased appetite and of patients presenting and not presenting fatigue. AFP: alpha-feto-protein; ALBI: Albumin-Bilirubin; BCLC: Barcelona Clinic Liver Cancer; CP: Child-Pugh; EHD: extrahepatic disease; NLR: neutrophil-lymphocyte ratio; PS: performance status; PVT: portal vein thrombosis.
